| Disease   | High incidence*<br>weeks only | Cases  | <u>NobBS</u> |       |        |                  | <u>HH (ref. 9)</u> |       |        |                  |
|-----------|-------------------------------|--------|--------------|-------|--------|------------------|--------------------|-------|--------|------------------|
|           |                               |        | MAE          | rRMSE | RMSE   | Average<br>Score | MAE                | rRMSE | RMSE   | Average<br>Score |
| Dengue    | 1992                          | 2986   | 18           | 0.278 | 22.8   | 0.186            | 33                 | 0.509 | 38.1   | 0.111            |
|           | 1993                          | 950    | 15           | 0.278 | 18.4   | 0.246            | 27                 | 0.496 | 31.7   | 0.130            |
|           | 1994                          | 4758   | 43           | 0.358 | 58.7   | 0.000            | 62                 | 0.490 | 73.3   | 0.081            |
|           | 1995                          | 1073   | 21           | 0.370 | 23.6   | 0.174            | 30                 | 0.473 | 40.0   | 0.137            |
|           | 1996                          | 1134   | 13           | 0.256 | 15.7   | 0.289            | 23                 | 0.471 | 27.8   | 0.176            |
|           | 1997                          | 1732   | 20           | 0.309 | 23.6   | 0.213            | 26                 | 0.363 | 32.8   | 0.160            |
|           | 1998                          | 5305   | 32           | 0.372 | 47.7   | 0.134            | 67                 | 0.809 | 90.9   | 0.070            |
|           | 1999                          | 743    | 13           | 0.265 | 15.9   | 0.356            | 24                 | 0.497 | 30.7   | 0.186            |
|           | 2000                          | 207    | 13           | 0.303 | 15.8   | 0.151            | 26                 | 0.535 | 28.2   | 0.118            |
|           | 2001                          | 1525   | 21           | 0.254 | 24.4   | 0.257            | 45                 | 0.567 | 54.5   | 0.090            |
|           | 2003                          | 544    | 10           | 0.254 | 15.5   | 0.419            | 54                 | 1.175 | 70.7   | 0.095            |
|           | 2005                          | 1982   | 27           | 0.276 | 33.7   | 0.177            | 43                 | 0.435 | 50.5   | 0.107            |
|           | 2007                          | 2596   | 74           | 0.546 | 92.8   | 0.000            | 112                | 0.725 | 137.4  | 0.006            |
|           | 2008                          | 168    | 29           | 0.527 | 29.5   | 0.059            | 83                 | 1.482 | 83.0   | 0.103            |
|           | 2009                          | 1567   | 24           | 0.374 | 30.1   | 0.153            | 39                 | 0.517 | 46.9   | 0.120            |
| 2010      | 6602                          | 78     | 0.603        | 139.8 | 0.000  | 133              | 0.895              | 208.7 | 0.030  |                  |
| Influenza | 2014-2015                     | 675744 | 969          | 0.063 | 1482.2 | 0.129            | 885                | 0.055 | 1401.8 | 0.016            |
|           | 2015-2016                     | 551267 | 982          | 0.086 | 1158.8 | 0.148            | 602                | 0.055 | 828.8  | 0.010            |
|           | 2016-2017                     | 713272 | 735          | 0.048 | 906.4  | 0.176            | 815                | 0.043 | 1044.8 | 0.005            |

\* Dengue outbreak weeks are defined as weeks for which dengue cases exceeded 50.

Influenza outbreak weeks are defined per the CDC definition, as Epidemiologic Weeks 40 through Week 20 of the following year, per CDC standard.
