| <b>Model</b> | <b>Moving window size</b>   | <b>rRMSE</b> | <b>Average Score</b> | <b>Correlation</b> |
|--------------|-----------------------------|--------------|----------------------|--------------------|
| NobBS        | 5 weeks                     | 7.381        | 0.368                | 0.275              |
|              | 12                          | 0.634        | 0.370                | 0.760              |
|              | 27 weeks (approx. 6 months) | 0.655        | 0.369                | 0.806              |
|              | 104 weeks (approx. 2 years) | 0.600        | 0.349                | 0.84               |
