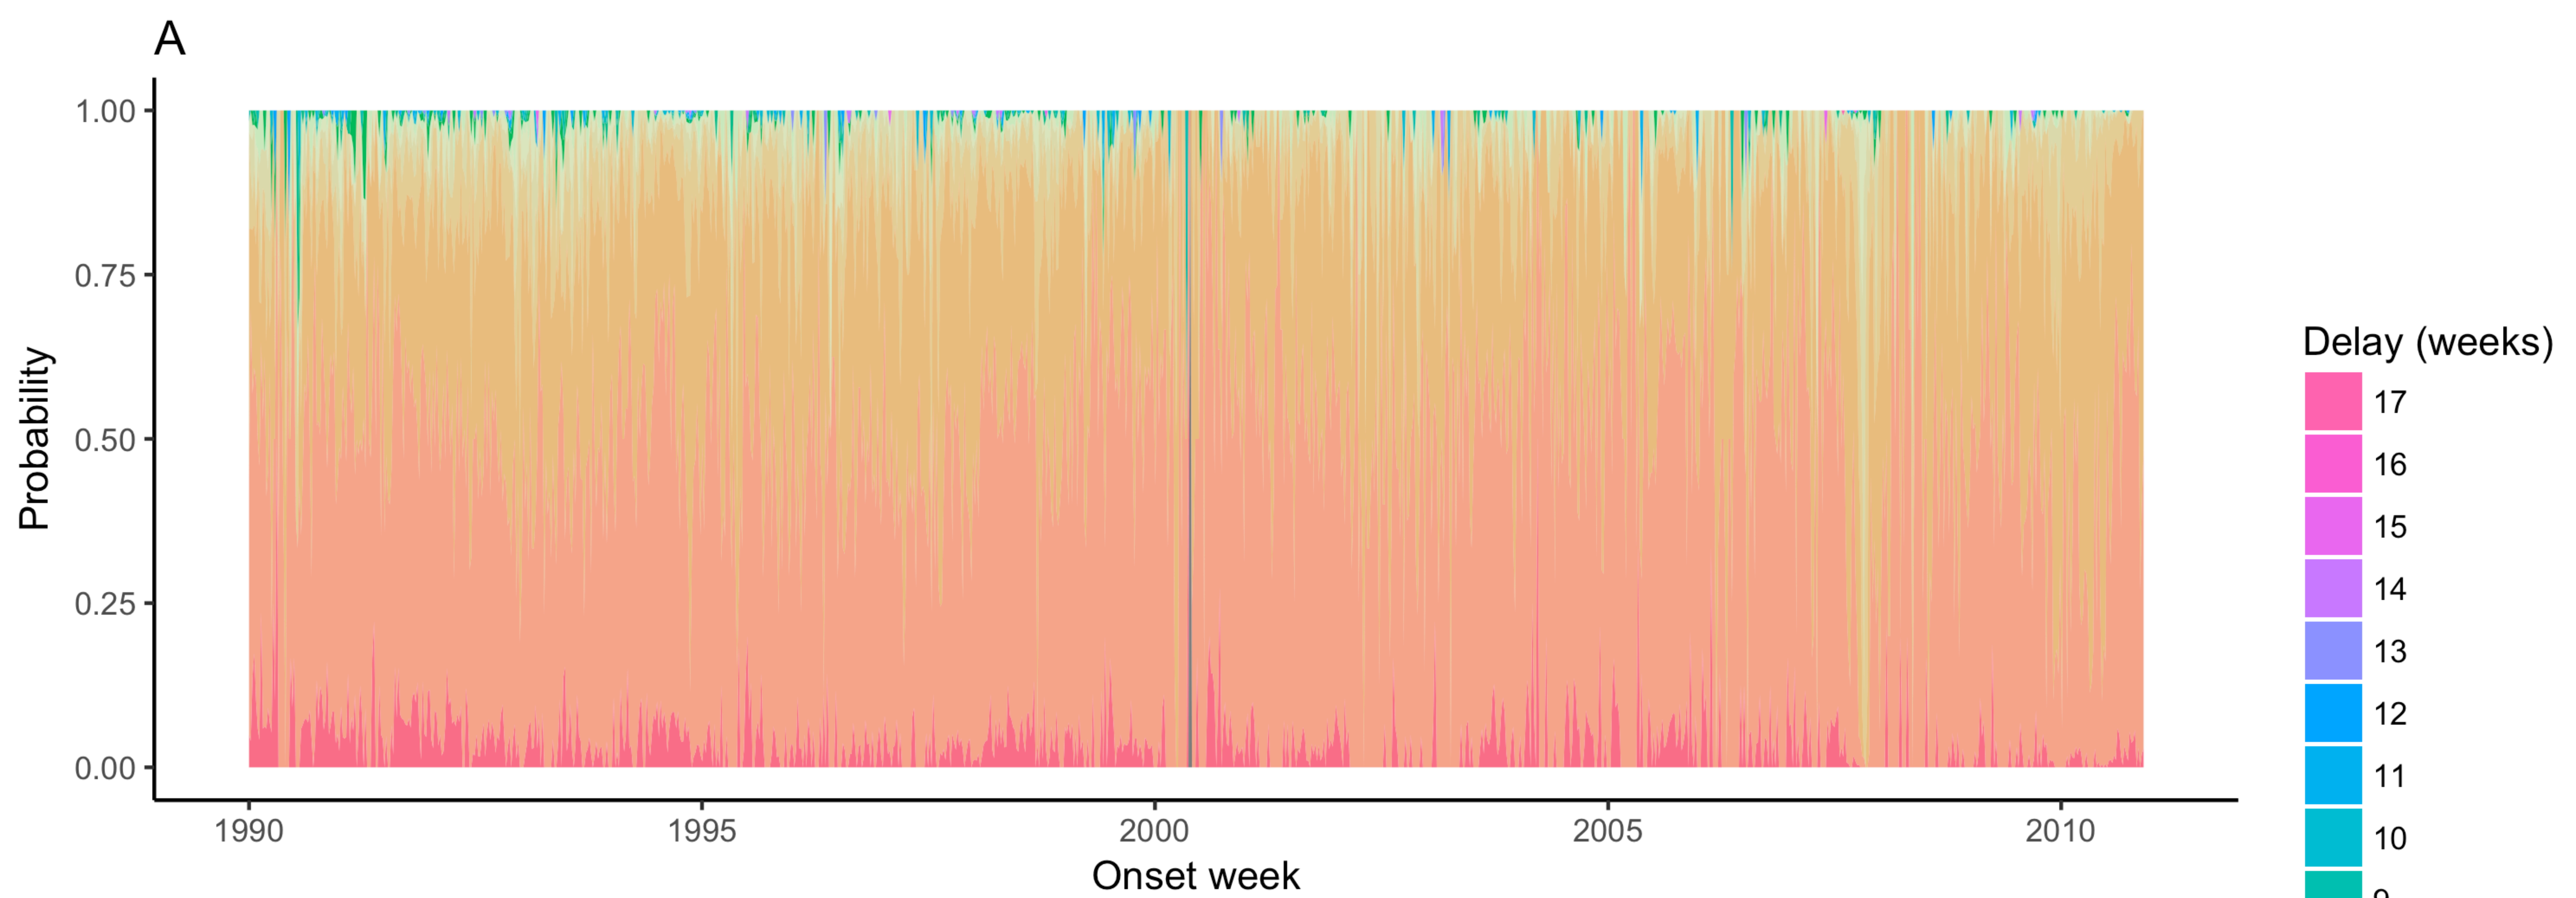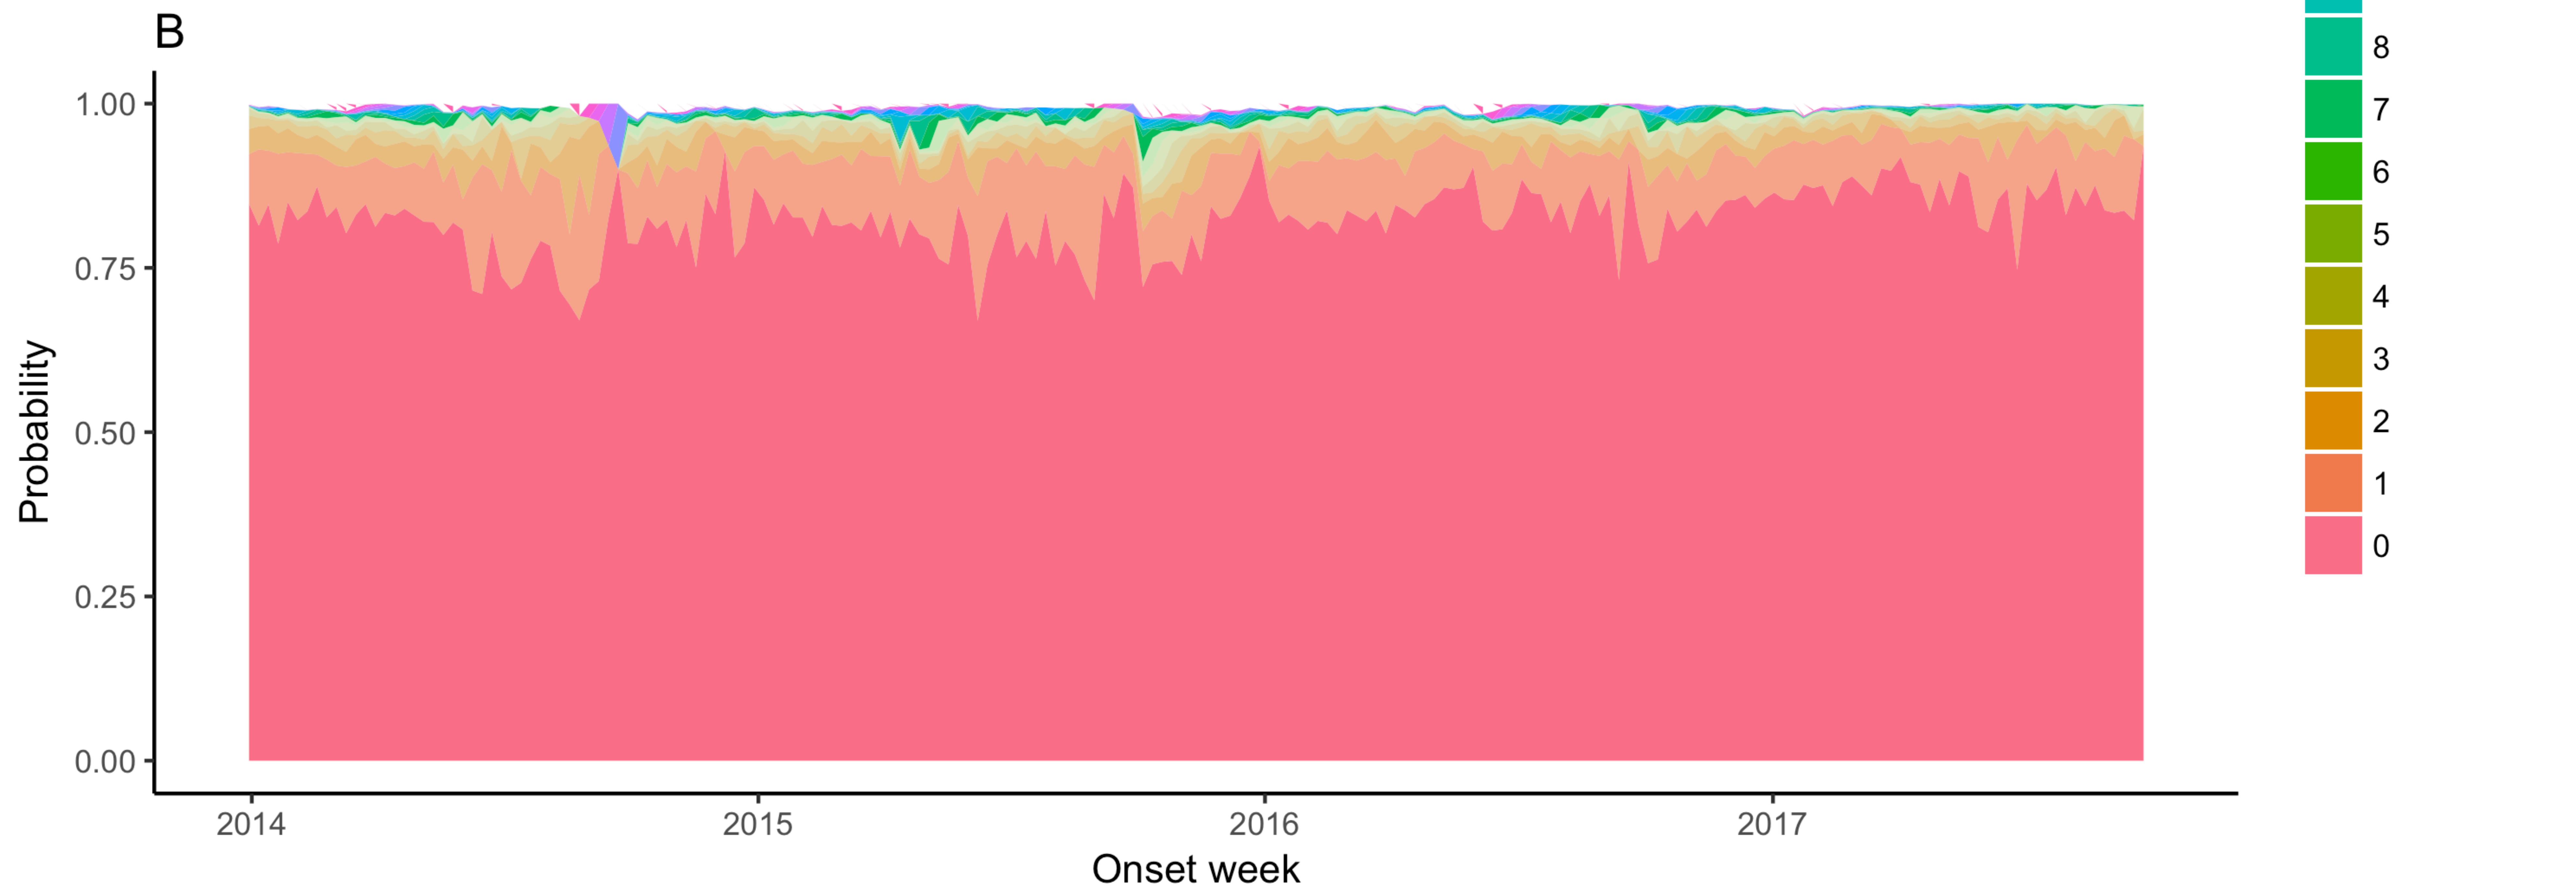

Source: https://storage.googleapis.com/plos-corpus-prod/10.1371/journal.pcbi.1007735/2/pcbi.1007735.s010.pdf
